# Supplementary material
Source: PubMed Central journal article supplement (PMC4485609)
Supplement: NIHMS66451-supplement-supplement.pdf [file NIHMS66451-supplement-supplement.pdf]

**Supplementary Figure 1 Quantitation of Omomyc and c-Myc expression in mouse tissues. Real-time PCR of Omomyc and c-myc expression relative to GUS in various mouse tissues confirms widespread expression of the transgene at levels comparable or higher than c-myc.**

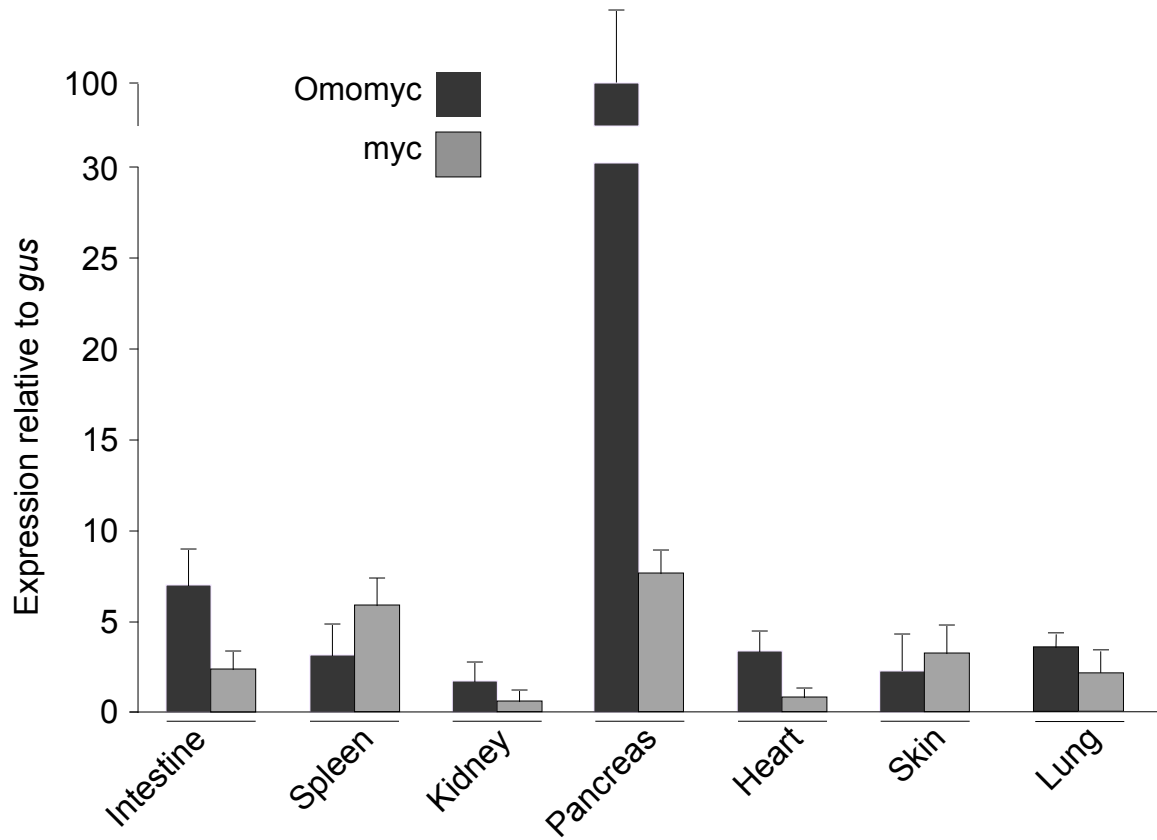

**Supplementary Figure 2. Influence of long-term systemic Omomyc expression on mouse weight. Graphical representation of weights of 4 week Doxycyclin treated animals versus untreated controls (cohorts of 8 mice each). Body weights are expressed as percentages of initial weight.**

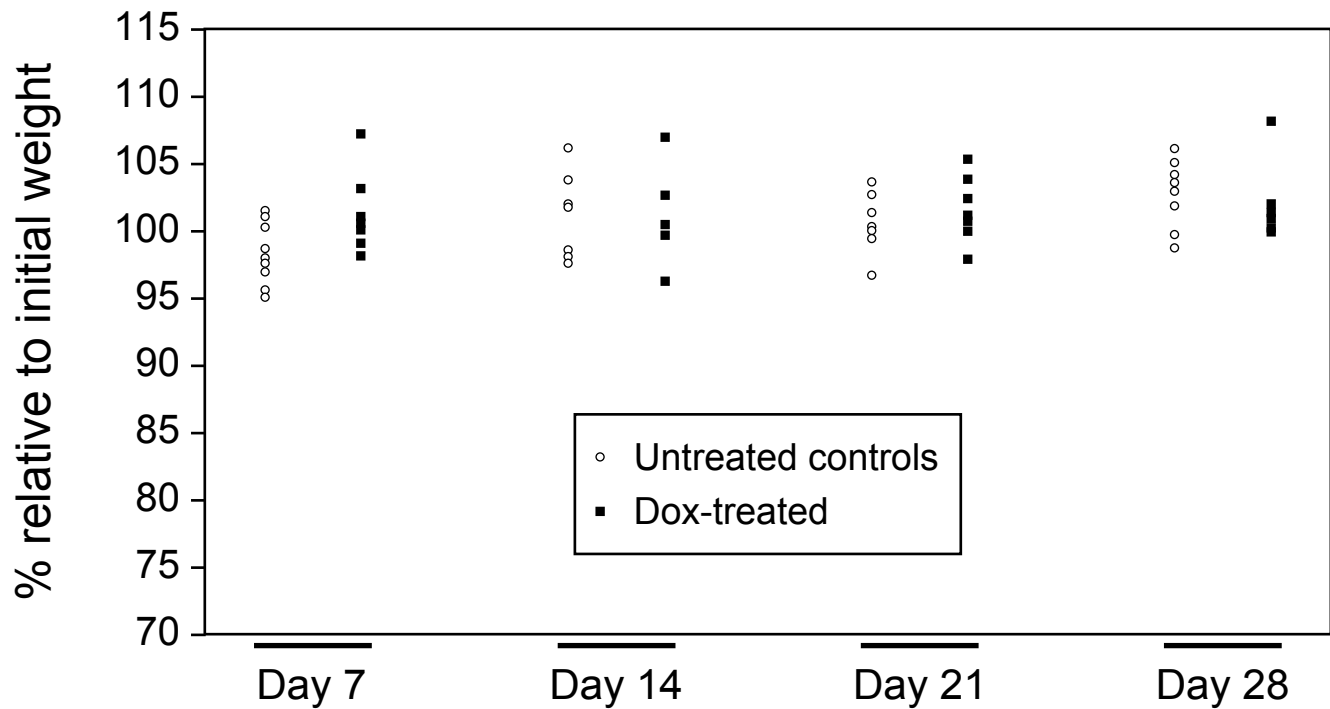

**Supplementary Figure 3. Systemic Omomyc expression suppresses hair re-growth. Omomyc expressing mice (TRE-Omomyc;CMVrtTA+ Dox) and CMVrtTA-only expressing controls (CMVrtTA+ Dox) were shaved and subjected to Doxycyclin treatment for 2 months. Omomyc expression completely blocks hair re-growth.**

day 0

day 60

*CMVrtTA + Dox*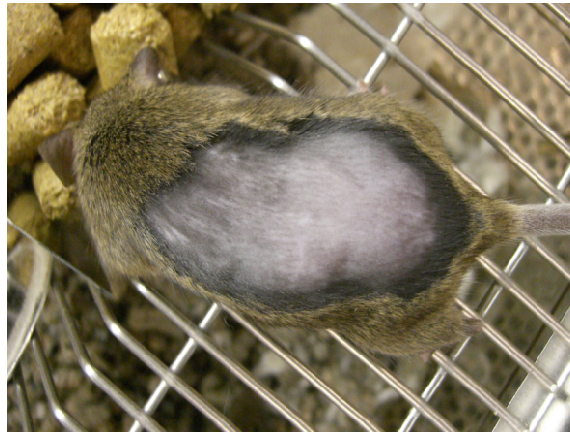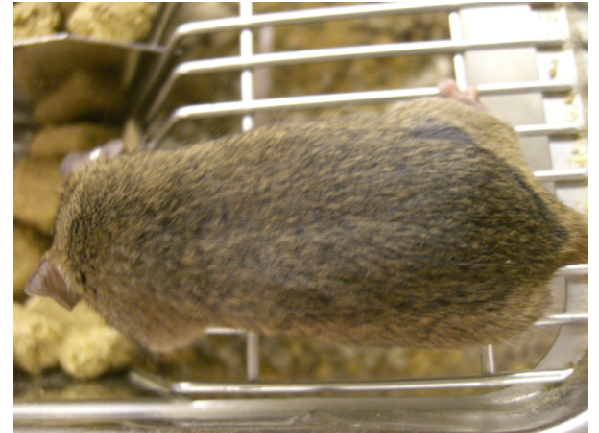*TRE-Omomyc;  
CMVrtTA  
+ Dox*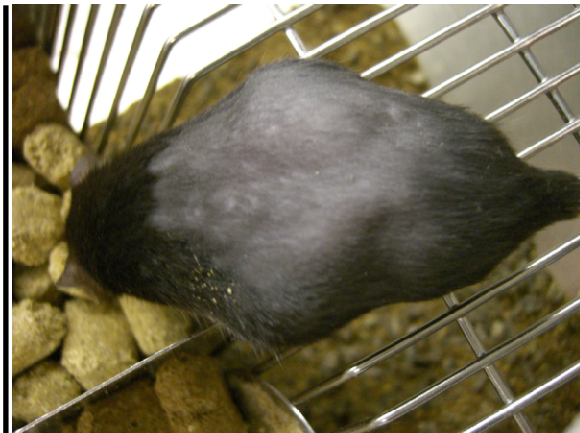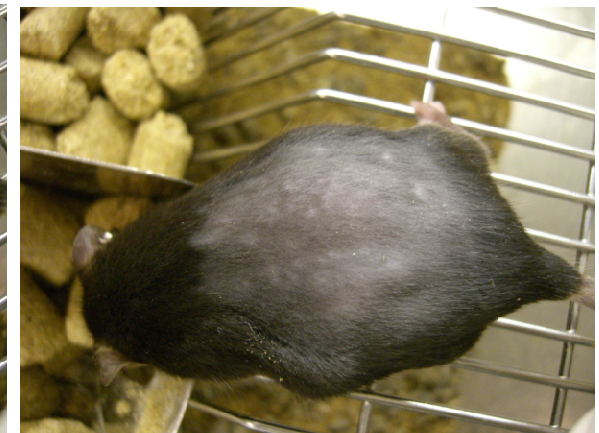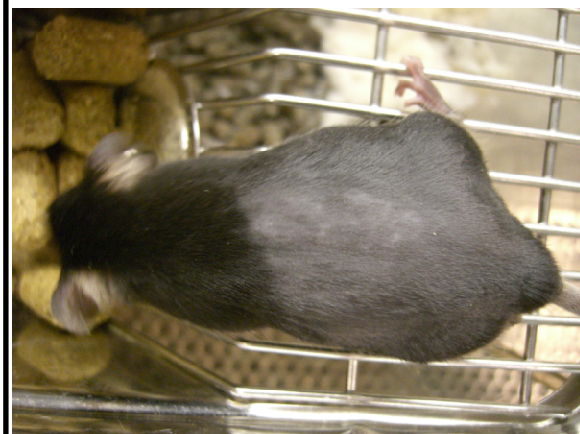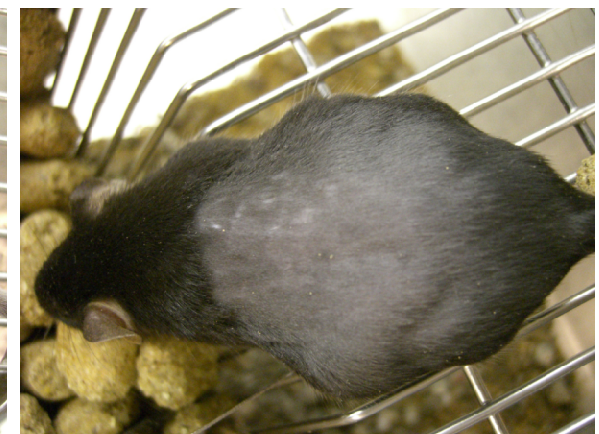

**Supplementary Figure 4. Induction of Omomyc in TRE-Omomyc;  $\beta$ -actin-rtTA mice recapitulates the intestinal and skin phenotypes of Doxycyclin treated TRE-Omomyc;CMVrtTA mice and, additionally, elicits increased extramedullary hematopoiesis in spleen.**

**(a) H&E staining of small intestine (top panels) from  $\beta$ -actin-rtTA or TRE-Omomyc;  $\beta$ -actin-rtTA mice treated for 2 weeks with Doxycyclin.**

**(b) H&E staining of skin from  $\beta$ -actin-rtTA or TRE-Omomyc;  $\beta$ -actin-rtTA mice treated for 2 weeks with Doxycyclin.**

**(c) H&E-stained sections from spleen of control ( $\beta$ -actin-rtTA) or Omomyc-expressing (TRE-Omomyc;  $\beta$ -actin-rtTA) mice treated for 2 weeks with Doxycyclin.**

**a**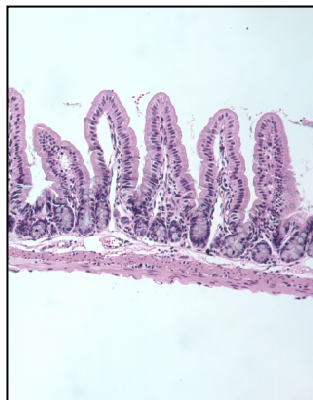

$\beta$ -actin-rtTA  
+ dox

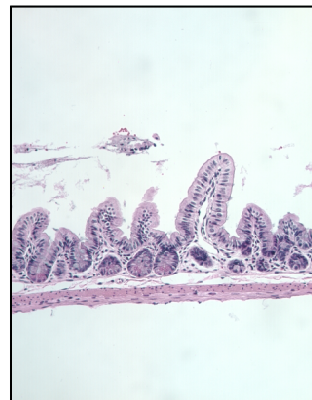

TRE-Omomyc; $\beta$ -actin-rtTA  
+ dox

**b**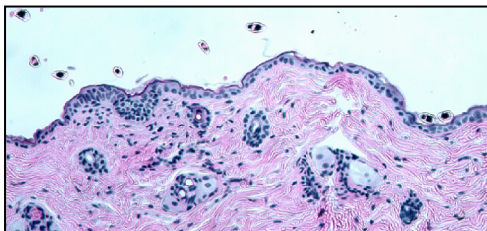

$\beta$ -actin-rtTA  
+ dox

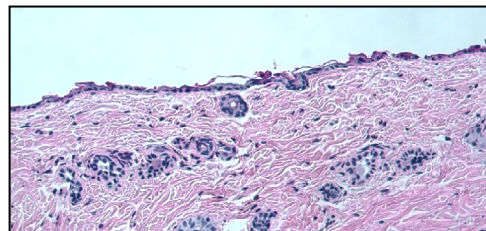

TRE-Omomyc; $\beta$ -actin-rtTA  
+ dox

**c**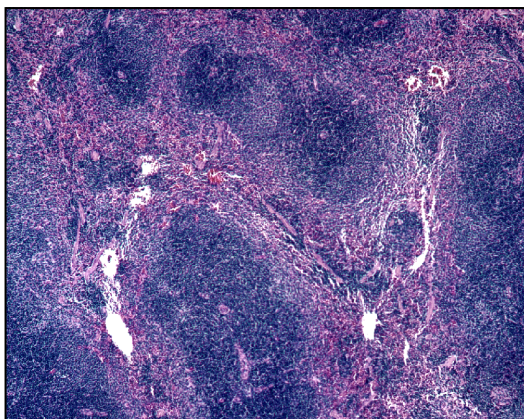

$\beta$ -actin-rtTA  
+ dox

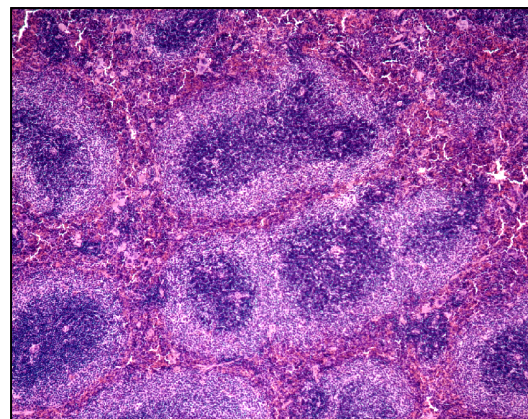

TRE-Omomyc; $\beta$ -actin-rtTA  
+ dox

**Supplementary Table1. Long-term systemic Omomyc expression has no significant impact on blood chemistry (4 week Doxycyclin treated mice)**

|                          | <u>Omomyc-expressing</u> | <u>Control</u> |
|--------------------------|--------------------------|----------------|
| Alk. Phosphatase (U/L)   | 32.3 ± 17.5              | 32.6 ± 22.1    |
| ALT (SGPT) (U/L)         | 66.6 ± 8.9               | 70.0 ± 16.9    |
| Albumin (g/dL)           | 3.3 ± 0.1                | 3.4 ± 0.4      |
| Total Protein (g/dL)     | 6.1 ± 0.05               | 6.1 ± 0.5      |
| Globulin (g/dL)          | 2.8 ± 0.05               | 2.7 ± 0.1      |
| Tot. Bilirubin (mg/dL)   | 0.1 ± 0.05               | 0.1 ± 0.05     |
| Direct Bilirubin (mg/dL) | 0.1 ± 0.05               | 0.1 ± 0.05     |
| BUN (mg/dL)              | 26.6 ± 2.5               | 25.3 ± 0.5     |
| Creatinin (mg/dL)        | 0.3 ± 0.1                | 0.3 ± 0.1      |
| Calcium (mg/dL)          | 10.5 ± 0.05              | 10.3 ± 1.1     |
| Phosphorus (mg/dL)       | 12.2 ± 0.6               | 13.0 ± 1.9     |
| TCO <sub>2</sub> (mEq/L) | 15.0 ± 1.0               | 12.3 ± 20.8    |
| Chloride (mEq/L)         | 108.6 ± 1.5              | 108.0 ± 0.1    |
| Potassium (mEq/L)        | 13.0 ± 0.6               | 15.1 ± 5.1     |
| Sodium (mEq/L)           | 145.5 ± 0.5              | 142.0 ± 9.8    |
| A/G ratio                | 1.1 ± 0.05               | 1.3 ± 0.1      |
| B/C ration               | 88.9 ± 8.4               | 91.9 ± 34.5    |

Soucek et al. Supplementary Table 2

**Myc inhibition causes anemia, which is rapidly resolved****Bone marrow studies: 1 week treatment****Control mice (expressing TREOmomyc or actin-rtTA only)**

| Leukocytes: | Results     |
|-------------|-------------|
| WBC (K/ul)  | 5.94 ± 2.3  |
| NE (K/ul)   | 0.99 ± 0.6  |
| LY (K/ul)   | 4.57 ± 3.1  |
| MO (K/ul)   | 0.24 ± 0.1  |
| EO (K/ul)   | 0.11 ± 0.02 |
| BA (K/ul)   | 0.02 ± 0.01 |

|        |             |
|--------|-------------|
| NE (%) | 17.11 ± 2.7 |
| LY (%) | 76.19 ± 5.9 |
| MO (%) | 4.49 ± 2.2  |
| EO (%) | 1.9 ± 0.8   |
| BA (%) | 0.3 ± 0.2   |

| Erythrocytes: | Results    |
|---------------|------------|
| RBC (M/ul)    | 7.61 ± 1.1 |
| Hb (g/dl)     | 12.5 ± 1.2 |
| HCT (%)       | 39.3 ± 4.3 |
| MCV (fL)      | 51.6 ± 1.6 |
| MCH (pg)      | 16.4 ± 2.0 |
| MCHC (g/dl)   | 31.8 ± 0.9 |
| RDW (%)       | 18.0 ± 2.1 |

| Thrombocytes | Results   |
|--------------|-----------|
| PLT (K/ul)   | 277 ± 131 |
| MPV (fL)     | 6.1 ± 1.1 |

**Omomyc mice (TREOmomyc;actin-rtTA+ Dox)**

| Leukocytes: | Results     | Normal Range |
|-------------|-------------|--------------|
| WBC (K/ul)  | 2.0 ± 1.1   | 1.8 - 10.7   |
| NE (K/ul)   | 0.14 ± 0.3  | 0.1 - 2.4    |
| LY (K/ul)   | 1.75 ± 0.7  | 0.9 - 9.3    |
| MO (K/ul)   | 0.1 ± 0.1   | 0.0 - 0.4    |
| EO (K/ul)   | 0.03 ± 0.01 | 0.0 - 0.2    |
| BA (K/ul)   | 0.01 ± 0.01 | 0.0 - 0.2    |

|        |             |             |
|--------|-------------|-------------|
| NE (%) | 8.23 ± 5.2  | 6.6 - 38.9  |
| LY (%) | 84.42 ± 9.8 | 55.8 - 91.6 |
| MO (%) | 4.86 ± 1.2  | 0.0 - 7.5   |
| EO (%) | 1.9 ± 1.5   | 0.0 - 3.9   |
| BA (%) | 0.5 ± 0.6   | 0.0 - 2.0   |

| Erythrocytes: | Results    | Normal Range |
|---------------|------------|--------------|
| RBC (M/ul)    | 2.33 ± 1.0 | 6.36 - 9.42  |
| Hb (g/dl)     | 3.3 ± 0.9  | 11.0 - 15.1  |
| HCT (%)       | 12.2 ± 2.3 | 35.1 - 45.4  |
| MCV (fL)      | 53.3 ± 7.2 | 45.4 - 60.3  |
| MCH (pg)      | 14.3 ± 1.3 | 14.1 - 19.3  |
| MCHC (g/dl)   | 26.8 ± 2.0 | 30.2 - 34.2  |
| RDW (%)       | 18.3 ± 1.8 | 12.4 - 27.0  |

| Thrombocytes | Results   | Normal Range |
|--------------|-----------|--------------|
| PLT (K/ul)   | 77 ± 69   | 592 - 2972   |
| MPV (fL)     | 6.1 ± 0.9 | 5.0 - 20.0   |

**Bone marrow studies: 2 week treatment****Control mice (expressing TREOmomyc or actin-rtTA only)**

| Leukocytes: | Results     |
|-------------|-------------|
| WBC (K/ul)  | 2.03 ± 0.3  |
| NE (K/ul)   | 0.44 ± 0.2  |
| LY (K/ul)   | 1.43 ± 0.3  |
| MO (K/ul)   | 0.1 ± 0.1   |
| EO (K/ul)   | 0.04 ± 0.02 |
| BA (K/ul)   | 0.02 ± 0.01 |

|        |             |
|--------|-------------|
| NE (%) | 21.88 ± 5.3 |
| LY (%) | 70.4 ± 4.2  |
| MO (%) | 5.12 ± 0.6  |
| EO (%) | 1.85 ± 1.0  |
| BA (%) | 0.74 ± 0.2  |

| Erythrocytes: | Results    |
|---------------|------------|
| RBC (M/ul)    | 7.61 ± 1.1 |
| Hb (g/dl)     | 12.5 ± 1.2 |
| HCT (%)       | 39.3 ± 4.3 |
| MCV (fL)      | 51.6 ± 1.6 |
| MCH (pg)      | 16.4 ± 2.0 |
| MCHC (g/dl)   | 31.8 ± 0.9 |
| RDW (%)       | 18.0 ± 2.1 |

| Thrombocytes | Results   |
|--------------|-----------|
| PLT (K/ul)   | 277 ± 131 |
| MPV (fL)     | 6.1 ± 1.1 |

**Omomyc mice (TREOmomyc;actin-rtTA+ Dox)**

| Leukocytes: | Results     | Normal Range |
|-------------|-------------|--------------|
| WBC (K/ul)  | 4.7 ± 2.2   | 1.8 - 10.7   |
| NE (K/ul)   | 0.87 ± 0.8  | 0.1 - 2.4    |
| LY (K/ul)   | 2.7 ± 0.3   | 0.9 - 9.3    |
| MO (K/ul)   | 0.19 ± 0.1  | 0.0 - 0.4    |
| EO (K/ul)   | 0.05 ± 0.03 | 0.0 - 0.2    |
| BA (K/ul)   | 0.03 ± 0.01 | 0.0 - 0.2    |

|        |             |             |
|--------|-------------|-------------|
| NE (%) | 34.9 ± 3.2  | 6.6 - 38.9  |
| LY (%) | 59.02 ± 3.3 | 55.8 - 91.6 |
| MO (%) | 4.11 ± 1.0  | 0.0 - 7.5   |
| EO (%) | 1.18 ± 0.9  | 0.0 - 3.9   |
| BA (%) | 0.7 ± 0.4   | 0.0 - 2.0   |

| Erythrocytes: | Results     | Normal Range |
|---------------|-------------|--------------|
| RBC (M/ul)    | 10.76 ± 1.2 | 6.36 - 9.42  |
| Hb (g/dl)     | 14.25 ± 0.9 | 11.0 - 15.1  |
| HCT (%)       | 48.6 ± 2.0  | 35.1 - 45.4  |
| MCV (fL)      | 49.85 ± 2.2 | 45.4 - 60.3  |
| MCH (pg)      | 14.6 ± 0.7  | 14.1 - 19.3  |
| MCHC (g/dl)   | 29.35 ± 1.8 | 30.2 - 34.2  |
| RDW (%)       | 16.95 ± 1.7 | 12.4 - 27.0  |

| Thrombocytes | Results   | Normal Range |
|--------------|-----------|--------------|
| PLT (K/ul)   | 276 ± 110 | 592 - 2972   |
| MPV (fL)     | 5.8 ± 0.4 | 5.0 - 20.0   |

Soucek et al. Supplementary Table 3

**Summary of number and genotypes of mice used for each experiment**

| <b>GENOTYPE</b>                                                                       | <b># mice</b> |
|---------------------------------------------------------------------------------------|---------------|
| <b>Prevention study in LSL-Kras driven lung tumors: 4 week treatment</b>              |               |
| TRE-Omomyc;CMV-rtTA;LSLKRas +Dox                                                      | 5             |
| LSLKRas +Dox                                                                          | 4             |
| TRE-Omomyc +Dox                                                                       | 4             |
| TRE-Omomyc;CMV-rtTA;LSLKRas -Dox                                                      | 3             |
| LSLKRas -Dox                                                                          | 4             |
| CMV-rtTA -Dox                                                                         | 4             |
| <b>Intervention study in LSL-Kras driven lung tumors: 6 weeks + 1 week treatment</b>  |               |
| TRE-Omomyc;CMV-rtTA;LSLKRas +Dox                                                      | 4             |
| CMV-rtTA;LSLKRas +Dox                                                                 | 3             |
| TRE-Omomyc +Dox                                                                       | 3             |
| TRE-Omomyc;CMV-rtTA;LSLKRas -Dox                                                      | 3             |
| TRE-Omomyc;LSLKRas -Dox                                                               | 3             |
| TREOmomyc;CMVrtTA -Dox                                                                | 3             |
| <b>Intervention study in LSL-Kras driven lung tumors: 18 weeks + 4 week treatment</b> |               |
| TRE-Omomyc;CMV-rtTA;LSLKRas +Dox                                                      | 6             |
| CMV-rtTA;LSLKRas +Dox                                                                 | 3             |
| TREOmomyc;LSLKRas +Dox                                                                | 3             |
| TRE-Omomyc +Dox                                                                       | 3             |
| TRE-Omomyc;CMV-rtTA;LSLKRas -Dox                                                      | 3             |
| LSLKRas -Dox                                                                          | 3             |
| TREOmomyc;CMVrtTA -Dox                                                                | 3             |
| <b>Side effects studies: 4 week treatment</b>                                         |               |
| TREOmomyc;CMVrtTA + Dox                                                               | 8             |
| TREOmomyc + Dox                                                                       | 7             |
| CMV-rtTA -Dox                                                                         | 8             |
| TREOmomyc;CMVrtTA - Dox                                                               | 6             |
| TREOmomyc - Dox                                                                       | 4             |
| CMV-rtTA +Dox                                                                         | 6             |
| <b>Blood counts: 1 week treatment</b>                                                 |               |
| TREOmomyc;actin-rtTA + Dox                                                            | 3             |
| TREOmomyc + Dox                                                                       | 2             |
| actin-rtTA +Dox                                                                       | 2             |
| TREOmomyc;actin-rtTA - Dox                                                            | 2             |
| TREOmomyc - Dox                                                                       | 2             |
| actin-rtTA -Dox                                                                       | 1             |
| <b>Blood counts: 2 week treatment</b>                                                 |               |
| TREOmomyc;actin-rtTA + Dox                                                            | 6             |
| TREOmomyc + Dox                                                                       | 2             |
| actin-rtTA +Dox                                                                       | 2             |
| TREOmomyc;actin-rtTA - Dox                                                            | 3             |
| TREOmomyc - Dox                                                                       | 2             |
| actin-rtTA -Dox                                                                       | 2             |
